# Supplementary material
Source: PubMed Central journal article supplement (PMC2726397)
Supplement: 0905818106_ST1_PDF.pdf [file 0905818106_ST1_PDF.pdf]

Table S1. Data used to draw Figs. 1 and 2 and S1 and S2.

| organism <sup>1</sup>      | abbrev. In figs. | genre   | N- glycan Length <sup>2</sup> | QC | %AT         | # sequon per protein | sequon density / 500 aa | NxT density secreted / cytosolic <sup>3</sup> | NxT secreted actual / expected <sup>4</sup> | % proteins with $\geq 1$ sequons |
|----------------------------|------------------|---------|-------------------------------|----|-------------|----------------------|-------------------------|-----------------------------------------------|---------------------------------------------|----------------------------------|
| <i>Antonospora</i>         | a                | Fungi   | 0                             | N  | 53.7        | 2.0                  | 2.9                     | 1.0                                           | 0.9                                         | 78.5                             |
| <i>Encephalitozoon</i>     | e                | Fungi   | 0                             | N  | 52.5        | 1.6                  | 2.3                     | 1.0                                           | 0.9                                         | 73.3                             |
| <i>Cryptosporidium</i>     | A                | Protist | 8                             | N  | 68.3        | 6.7                  | 4.7                     | 1.1                                           | 1.1*                                        | 93.1                             |
| <i>Giardia</i>             | D                | Protist | 2                             | N  | 51.0        | 3.2                  | 3.4                     | 1.4**                                         | 1.1                                         | 71.9                             |
| <i>Plasmodium</i>          | F                | Protist | 2                             | N  | 75.7        | 6.9                  | 5.7                     | 0.9                                           | 1.0                                         | 93.9                             |
| <i>Theileria</i>           | G                | Protist | 0                             | N  | 64.2        | 5.6                  | 4.7                     | 1.0                                           | 1.1                                         | 92.0                             |
| <i>Toxoplasma</i>          | K                | Protist | 10                            | N  | 41.0        | 1.6                  | 1.6                     | 1.2**                                         | 1.0                                         | 68.8                             |
| <b>AVERAGE</b>             |                  |         | <b>3.1</b>                    |    | <b>58.1</b> | <b>3.9</b>           | <b>3.6</b>              | <b>1.1</b>                                    | <b>1.0</b>                                  | <b>81.6</b>                      |
| <i>Aspergillus</i>         | b                | Fungi   | 14                            | Y  | 46.6        | 3.2                  | 3.6                     | 2.0**                                         | 1.6**                                       | 80.9                             |
| <i>Candida</i>             | c                | Fungi   | 14                            | Y  | 64.9        | 4.2                  | 4.4                     | 1.2**                                         | 1.1**                                       | 84.8                             |
| <i>Cryptococcus</i>        | d                | Fungi   | 11                            | Y  | 49.0        | 3.4                  | 4.0                     | 2.5**                                         | 1.8**                                       | 82.2                             |
| <i>Gibberella</i>          | f                | Fungi   | 14                            | Y  | 48.3        | 2.8                  | 3.3                     | 1.8**                                         | 1.4**                                       | 76.3                             |
| <i>Kluyveromyces</i>       | g                | Fungi   | 14                            | Y  | 59.8        | 3.7                  | 3.9                     | 1.1                                           | 1.2**                                       | 87.1                             |
| <i>Magnaporthe</i>         | h                | Fungi   | 14                            | Y  | 42.0        | 2.5                  | 3.4                     | 2.1**                                         | 1.6**                                       | 71.8                             |
| <i>Neurospora</i>          | i                | Fungi   | 14                            | Y  | 43.9        | 2.9                  | 3.5                     | 2.0**                                         | 1.5**                                       | 81.5                             |
| <i>Saccharomyces</i>       | j                | Fungi   | 14                            | Y  | 60.5        | 3.7                  | 4.9                     | 1.6**                                         | 1.5**                                       | 77.7                             |
| <i>Schizosaccharomyces</i> | k                | Fungi   | 14                            | Y  | 60.3        | 5.0                  | 5.0                     | 2.0**                                         | 1.7**                                       | 89.8                             |
| <i>Ustilago</i>            | m                | Fungi   | 14                            | Y  | 43.8        | 2.9                  | 3.2                     | 1.7**                                         | 1.3**                                       | 71.9                             |
| <i>Yarrowia</i>            | n                | Fungi   | 14                            | Y  | 46.1        | 3.5                  | 3.9                     | 1.9**                                         | 1.5**                                       | 82.5                             |
| <i>Anopheles</i>           | 1                | Metazoa | 14                            | Y  | 43.6        | 1.9                  | 3.1                     | 1.3**                                         | 1.4**                                       | 68.4                             |
| <i>Caenorhabditis</i>      | 2                | Metazoa | 14                            | Y  | 56.7        | 3.0                  | 3.8                     | 1.6**                                         | 1.4**                                       | 77.1                             |
| <i>Canis</i>               | 3                | Metazoa | 14                            | Y  | 49.3        | 3.1                  | 3.4                     | 1.8**                                         | 1.6**                                       | 80.4                             |
| <i>Ciona</i>               | 4                | Metazoa | 14                            | Y  | 57.0        | 2.9                  | 4.1                     | 1.5**                                         | 1.3**                                       | 83.5                             |
| <i>Danio</i>               | 6                | Metazoa | 14                            | Y  | 49.7        | 3.3                  | 3.6                     | 1.7**                                         | 1.5**                                       | 83.8                             |
| <i>Drosophila</i>          | 5                | Metazoa | 14                            | Y  | 46.2        | 3.0                  | 3.5                     | 1.5**                                         | 1.4**                                       | 73.6                             |
| <i>Homo</i>                | 7                | Metazoa | 14                            | Y  | 47.9        | 3.8                  | 3.6                     | 2.0**                                         | 1.7**                                       | 81.2                             |
| <i>Mus</i>                 | 8                | Metazoa | 14                            | Y  | 47.7        | 3.7                  | 3.7                     | 2.2**                                         | 1.8**                                       | 82.3                             |
| <i>Tetraodon</i>           | 9                | Metazoa | 14                            | Y  | 43.1        | 2.9                  | 3.3                     | 1.9**                                         | 1.7**                                       | 78.5                             |
| <i>Arabidopsis</i>         | +                | Plant   | 14                            | Y  | 55.8        | 3.4                  | 4.3                     | 2.0**                                         | 1.6**                                       | 82.5                             |
| <i>Dictyostelium</i>       | B                | Protist | 14                            | Y  | 72.6        | 7.3                  | 6.8                     | 1.9**                                         | 1.4**                                       | 93.2                             |
| <i>Entamoeba</i>           | C                | Protist | 7                             | Y  | 72.1        | 4.3                  | 4.4                     | 1.5**                                         | 1.2**                                       | 86.1                             |
| <i>Leishmania</i>          | E                | Protist | 9                             | Y  | 37.4        | 2.1                  | 2.0                     | 1.2**                                         | 1.3**                                       | 76.7                             |
| <i>Trichomonas</i>         | J                | Protist | 7                             | Y  | 64.4        | 5.6                  | 6.3                     | 1.8**                                         | 1.6**                                       | 87.5                             |
| <i>Trypanosoma</i>         | H                | Protist | 11                            | Y  | 47.5        | 2.7                  | 3.2                     | 1.5**                                         | 1.4**                                       | 80.9                             |
| <b>AVERAGE</b>             |                  |         | <b>13</b>                     |    | <b>52.2</b> | <b>3.5</b>           | <b>3.9</b>              | <b>1.7</b>                                    | <b>1.5</b>                                  | <b>80.9</b>                      |

<sup>1</sup>Organisms lacking N-glycan-dependent QC of protein folding are colored red, while those with QC are colored blue. <sup>2</sup>N-glycan length predicted as in ref. 2. In the case of *Trypanosoma*, both the predicted 11 sugar precursor and a truncated precursor containing 7 sugars are added to N-glycans. <sup>3</sup>Measures extent of positive selection for sequons with Thr in secreted proteins. <sup>4</sup>Measures extent of conditional selection for sequons with Thr. \*\*Statistically greater at  $\alpha = 1\%$ . \*Statistically greater at  $\alpha = 5\%$ .
